# Supplementary material for: Effects of User Experience in Automated Information Processing on Perceived Usefulness of Digital Contact-Tracing Apps: Cross-Sectional Survey Study
Source: PubMed Central journal article supplement (PMC11234054; doi:10.2196/53940), 2024-06-25
Supplement: humanfactors_v11i1e53940_app1.pdf [file humanfactors_v11i1e53940_app1.pdf]

Scales

# Scales for Cross-sectional Survey Study on User Experience

All scales were originally in German and are translated. The translation have not been validated. All items use a 6-point Likert response scale from completely disagree = 1, largely disagree = 2, slightly disagree = 3, slightly agree = 4, largely agree = 5, to completely agree = 6

Items marked with \* are reversed.

## Use Intention

| Please indicate the degree to which you agree/disagree with the following statements. |   |   |   |   |   |   |
|---------------------------------------------------------------------------------------|---|---|---|---|---|---|
|                                                                                       | 1 | 2 | 3 | 4 | 5 | 6 |
| The CWA is an important component for me in dealing with the pandemic.                |   |   |   |   |   |   |
| I will use the CWA to feel safer.                                                     |   |   |   |   |   |   |
| I plan to follow the behavioral guidance in the CWA.                                  |   |   |   |   |   |   |

## Threat Appraisal

| Please indicate the degree to which you agree/disagree with the following statements. |   |   |   |   |   |   |
|---------------------------------------------------------------------------------------|---|---|---|---|---|---|
|                                                                                       | 1 | 2 | 3 | 4 | 5 | 6 |
| An undetected infection with the coronavirus has no negative consequences for me. *   |   |   |   |   |   |   |
| The fact that I can become infected without knowing it worries me.                    |   |   |   |   |   |   |
| It is not important to me to know my risk of infection.                               |   |   |   |   |   |   |
| I don't care if I don't know which contacts to inform after being infected. *         |   |   |   |   |   |   |

### Moral Obligation

| Please indicate the degree to which you agree/disagree with the following statements.         |   |   |   |   |   |   |
|-----------------------------------------------------------------------------------------------|---|---|---|---|---|---|
|                                                                                               | 1 | 2 | 3 | 4 | 5 | 6 |
| I have a moral obligation to use the Corona Warning App.                                      |   |   |   |   |   |   |
| I feel responsible for reducing the risk of infection to others during the COVID-19 pandemic. |   |   |   |   |   |   |
| We should all use the Corona Warning app for ethical reasons.                                 |   |   |   |   |   |   |

### Experienced System Traceability

| Please indicate the degree to which you agree/disagree with the following statements. |   |   |   |   |   |   |
|---------------------------------------------------------------------------------------|---|---|---|---|---|---|
|                                                                                       | 1 | 2 | 3 | 4 | 5 | 6 |
| It was transparent to me which information was collected by the system.               |   |   |   |   |   |   |
| The information that the system could acquire was observable for me.                  |   |   |   |   |   |   |
| It was understandable to me how the collected information led to the result.          |   |   |   |   |   |   |
| The system's information processing was comprehensible to me.                         |   |   |   |   |   |   |
| With the information accessible for me, the result was foreseeable for me.            |   |   |   |   |   |   |
| The system's information processing was predictable for me.                           |   |   |   |   |   |   |

### Perceived Data Validity (Perceived Trustworthiness I)

| Please indicate the degree to which you agree/disagree with the following statements. |   |   |   |   |   |   |
|---------------------------------------------------------------------------------------|---|---|---|---|---|---|
|                                                                                       | 1 | 2 | 3 | 4 | 5 | 6 |
| The information with which the CWA works is correct.                                  |   |   |   |   |   |   |
| The information used by the CWA is complete.                                          |   |   |   |   |   |   |
| The CWA does not have access to all relevant information.                             |   |   |   |   |   |   |
| The information used by the CWA is inaccurate. *                                      |   |   |   |   |   |   |

**Perceived Goal Congruency (Perceived Trustworthiness II)**

| Please indicate the degree to which you agree/disagree with the following statements. |   |   |   |   |   |   |
|---------------------------------------------------------------------------------------|---|---|---|---|---|---|
|                                                                                       | 1 | 2 | 3 | 4 | 5 | 6 |
| The goals of the CWA are in line with my goals.                                       |   |   |   |   |   |   |
| Supporting the CWA in its actions benefits myself.                                    |   |   |   |   |   |   |
| Using the CWA is detrimental to myself. *                                             |   |   |   |   |   |   |
| The CWA evaluates information using inappropriate criteria or comparisons. *          |   |   |   |   |   |   |

**Perceived Result Diagnosticity (Perceived Trustworthiness III)**

| Please indicate the degree to which you agree/disagree with the following statements. |   |   |   |   |   |   |
|---------------------------------------------------------------------------------------|---|---|---|---|---|---|
|                                                                                       | 1 | 2 | 3 | 4 | 5 | 6 |
| The results of the CWA are not meaningful. *                                          |   |   |   |   |   |   |
| When the CWA shows me information, it makes my decisions easier.                      |   |   |   |   |   |   |
| I can do something with the results of the CWA.                                       |   |   |   |   |   |   |
| I cannot assess what role the results of the CWA play for me. *                       |   |   |   |   |   |   |
