# Supplementary material for: Effects of User Experience in Automated Information Processing on Perceived Usefulness of Digital Contact-Tracing Apps: Cross-Sectional Survey Study
Source: PubMed Central journal article supplement (PMC11234054; doi:10.2196/53940), 2024-06-25
Supplement: humanfactors_v11i1e53940_app3.pdf [file humanfactors_v11i1e53940_app3.pdf]

## Appendix - Detailed Coding Scheme

| Top Code                                 | Sub Code                              | Definition                              | Anchoring example (original from German)                                                                                                        |                                                                                        |
|------------------------------------------|---------------------------------------|-----------------------------------------|-------------------------------------------------------------------------------------------------------------------------------------------------|----------------------------------------------------------------------------------------|
| <b>Contact/<br/>Risk<br/>Information</b> | <b>Time-related Information</b>       |                                         |                                                                                                                                                 |                                                                                        |
|                                          |                                       | Time period of contact                  | The time period when a registered contact happened, can also be an exact point in time                                                          | Wann (...) bin ich einer Person begegnet? (1, Pos. 1)                                  |
|                                          |                                       | Duration of contact                     | The duration of a registered contact                                                                                                            | Wie lange hatte ich Kontakt mit der Person in derselben Umgebung? (1, Pos. 1)          |
|                                          |                                       | Time since contact                      | The time passed since a contact happened                                                                                                        | Wann fand der Kontakt statt?                                                           |
|                                          |                                       | Time period of possible contact tracing | Period during which contact tracing was possible at all (e.g. cell phone present)                                                               | wann habe ich das Handy wirklich bei mir                                               |
|                                          | <b>Location-related information</b>   |                                         |                                                                                                                                                 |                                                                                        |
|                                          |                                       | Location of Contact                     | The (exact GPS) location of the contact                                                                                                         | (...) wo hatte ich (...) Kontakt zu einer Risiko-Person? (44, Pos. 1)                  |
|                                          |                                       | Direct/Indirect                         | Whether the contact was direct (i.e. without walls, glass or other blocking materials) or indirect (i.e. no direct line between faces possible) | War es eine direkte Begegnung oder saßen wir in unterschiedlichen Autos? (273, Pos. 1) |
|                                          |                                       | Outdoor/Indoor                          | Whether the place of contact was indoor or outdoor                                                                                              | War ich in einem geschlossenen Raum? (40, Pos. 1)                                      |
|                                          | <b>Exposition-related Information</b> |                                         |                                                                                                                                                 |                                                                                        |
|                                          | Mask Status                           | Whether the user wore a mask or not     | Maskenpflicht? (4, Pos. 1)                                                                                                                      |                                                                                        |
|                                          | Distance to Warning Person            | Distance between me and the contact     | genauer Abstand (14, Pos. 1)                                                                                                                    |                                                                                        |

| <b>Top Code</b>                     | <b>Sub Code</b>                              | <b>Definition</b>                                                                                                                                                           | <b>Anchoring example (original from German)</b>                                                                                                                                                                                            |
|-------------------------------------|----------------------------------------------|-----------------------------------------------------------------------------------------------------------------------------------------------------------------------------|--------------------------------------------------------------------------------------------------------------------------------------------------------------------------------------------------------------------------------------------|
|                                     | Amount of Devices/People when exposed        | Number of devices present during contact                                                                                                                                    | mit wie vielen Geräten bestand der Kontakt (131, Pos. 1)                                                                                                                                                                                   |
|                                     | Hygiene precautions                          | Hygienic precautions, implemented on site                                                                                                                                   | Konkreten Ort mitteilen (geschlossener Raum, frische luft) oder hygienemaßnahmen der Umgebung.                                                                                                                                             |
|                                     | Unspecified Scenarios                        | Other Information assisting the user in asserting his/her risk, topics may overlap with different codes of exposition-related information but are not sufficiently specific | Welche Begegnung hat dazu geführt? (ggf. problematisch für die Anonymität, dennoch wäre z.B. ein Zeitraum <24h hilfreich, um den Ort der Begegnung einschätzen und/oder Menschen ohne App/Warnung darauf hinweisen zu können) (97, Pos. 1) |
|                                     | <b>Action-related Information</b>            | Possible and suggested course of action                                                                                                                                     | Was muss ich jetzt tun? (195, Pos. 1)                                                                                                                                                                                                      |
|                                     | <b>Information related to warning person</b> |                                                                                                                                                                             |                                                                                                                                                                                                                                            |
|                                     | Time of Test                                 | Time when the infected person tested positive                                                                                                                               | Wann wurde das positive Testergebnis der Person eingetragen? (243, Pos. 1)                                                                                                                                                                 |
|                                     | Duration of infection                        | Point in time when the person through which the warning occurred became infected                                                                                            | Seit wann ist die positiv getestete Person infiziert? (146, Pos. 1)                                                                                                                                                                        |
|                                     | Symptoms in the person                       | The first time the person for whom my contact led to a warning experienced symptoms                                                                                         | Wann traten bei dem Kontakt die ersten Symptome auf? (177, Pos. 5)                                                                                                                                                                         |
|                                     | Vaccination status                           | Vaccination status of the person                                                                                                                                            | Impfstatus sollte in Risiko-Berechnung berücksichtigt werden                                                                                                                                                                               |
|                                     | Corona Variant                               | Corona variant (e.g. Omikron) with which the infected person is infected.                                                                                                   | virusvariante (258, Pos. 1)                                                                                                                                                                                                                |
| <b>Pandemic Related Information</b> | <b>Statistics</b>                            |                                                                                                                                                                             |                                                                                                                                                                                                                                            |
|                                     | Number of Deaths                             | The number of COVID-19 deaths                                                                                                                                               | Anzahl der Todesfälle, anstatt nur die Erkrankungen                                                                                                                                                                                        |

| <b>Top Code</b>                | <b>Sub Code</b>                                                | <b>Definition</b>                                             | <b>Anchoring example (original from German)</b>                                                                                                                                                                                                                                                                                                       |
|--------------------------------|----------------------------------------------------------------|---------------------------------------------------------------|-------------------------------------------------------------------------------------------------------------------------------------------------------------------------------------------------------------------------------------------------------------------------------------------------------------------------------------------------------|
|                                |                                                                |                                                               | anzugeben. (260, Pos. 2)                                                                                                                                                                                                                                                                                                                              |
|                                | Number of Infections                                           | The number of new COVID-19 infections                         | Kein Beispiel?                                                                                                                                                                                                                                                                                                                                        |
| <b>App Related Information</b> | <b>Number of Users</b>                                         | The number of users of the CWA                                | Ist das Risiko jetzt wirklich so niedrig oder nutzen die App einfach weniger Leute als noch letztes Jahr? (37, Pos. 1)                                                                                                                                                                                                                                |
|                                | <b>General Calculation-related information</b>                 |                                                               |                                                                                                                                                                                                                                                                                                                                                       |
|                                | Reasons for Status Change                                      | Reasons for the change in risk calculation                    | Wie genau die Risikoermittlung funktioniert, d.h. wie müssen Abstand und Zeit zu einer positiv getesteten Person tatsächlich ausfallen, damit ich eine Meldung erhalte und der Status geändert wird. (39, Pos. 1)                                                                                                                                     |
|                                | Calculation parameters                                         | Parameters used by the system for the calculations            | Berechnungsgrundlage für erhöhtes Risiko ist sehr schwer herauszufinden (233, Pos. 1)                                                                                                                                                                                                                                                                 |
|                                | <b>Certainty about result</b>                                  | Certainty of the results calculated by the system             | Wie sicher ist das Ergebnis? (193, Pos. 1)                                                                                                                                                                                                                                                                                                            |
|                                | <b>Integration of Tests (self and externally administered)</b> | The ability to enter or delete results from tests in the app  | Dass ich Corona-positiv bin, ohne einen PCR Test gemacht zu haben.                                                                                                                                                                                                                                                                                    |
|                                | <b>Linking with private data</b>                               | Possibility to link the app functionalities with private data | Lokal Kontakte aus Telefonbuch zu Tagebucheinträgen hinzufügen                                                                                                                                                                                                                                                                                        |
| <b>Others</b>                  |                                                                | Everything that does not fit any category                     | Bsp: Ich wurde nach einem Messebesuch gewarnt mit roter Anzeige. Es macht für mich einen Unterschied, ob die Warnung aus einer Situation bei der Zugfahrt (ich hatte eine FFP2 Maske an, keine Gespräche mit den anderen Fahrgästen) oder bei der Messe (längeres Gespräch ohne Maske mit einer Person) entstanden ist. In der ersten Situation hätte |

---

| <b>Top Code</b>                                             | <b>Sub Code</b> | <b>Definition</b>                                             | <b>Anchoring example (original from German)</b>                                                                    |
|-------------------------------------------------------------|-----------------|---------------------------------------------------------------|--------------------------------------------------------------------------------------------------------------------|
|                                                             |                 |                                                               | ich mich kaum gefährdet gefühlt, in der zweiten Situation in sehr hohem Maße (8, Pos. 3)                           |
| <b>Assumed reasons for perceived information processing</b> | /               | Reasons for missing feature integration, e.g. data protection | Aber vermutlich datenschutztechnisch nicht umsetzbar, weil der Kontakt sonst ggf. durch mich identifizierbar wäre? |

## Appendix - Descriptive Data

| Information demand   | Automation2Human |     | Human2Automation |    |
|----------------------|------------------|-----|------------------|----|
|                      | <i>n</i>         | %   | <i>n</i>         | %  |
| Contact/Risk         | 196              | 93  | 62               | 82 |
| Time                 | 111              | 57  | 8                | 13 |
| Location             | 45               | 23  | 24               | 39 |
| Exposition           | 30               | 15  | 22               | 35 |
| Action               | 3                | 2   | 0                | 0  |
| Warning person       | 7                | 4   | 8                | 13 |
| App                  | 14               | 7   | 14               | 18 |
| Private data linking | 0                | 0   | 2                | 14 |
| User number          | 1                | 7   | 0                | 0  |
| General calculation  | 12               | 86  | 0                | 0  |
| Result certainty     | 1                | 7   | 0                | 0  |
| Test integration     | 0                | 0   | 12               | 86 |
| Pandemic             | 1                | 1   | 0                | 0  |
| Statistics           | 1                | 100 | 0                | 0  |

Note.  $N = 287$  ( $n = 211$  for Machine2Human and  $n = 76$  for Human2Machine).
